# Supplementary material for: Screening non-conventional yeasts for acid tolerance and engineering Pichia occidentalis for production of muconic acid
Source: Springer Nature journal article supplement (doi:10.1038/s41467-023-41064-5), 2023-08-31
Supplement: MOESM1 [file 41467_2023_41064_MOESM1_ESM.pdf]

**Screening non-conventional yeasts for acid tolerance and engineering *Pichia*  
*occidentalis* for production of muconic acid**

Pyne *et al.*

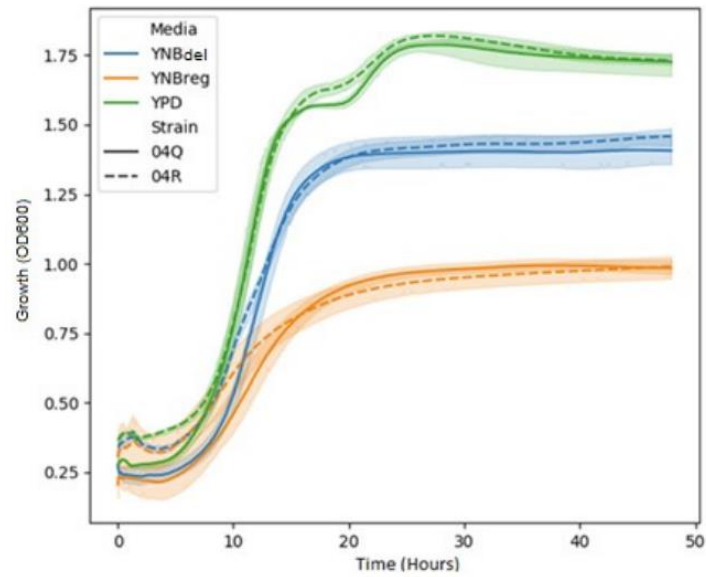

**Supplementary Figure 1. Comparison of *P. occidentalis* strain 04Q (YB-3389) and 04R (Y-6545) growth in standard 1× YNB medium (YNBreg) vs growth in 3× YNB medium (YNBdel).** Highlighted area shows the standard deviation of  $n = 3$  independent biological samples. YNBreg contains 20 g L<sup>-1</sup> glucose, 5.1 g L<sup>-1</sup> ammonium sulfate and 1.7 g L<sup>-1</sup> Yeast Nitrogen Base. YNBdel contains 20 g L<sup>-1</sup> glucose, 5.1 g L<sup>-1</sup> ammonium sulfate and 5.1 g L<sup>-1</sup> Yeast Nitrogen Base.

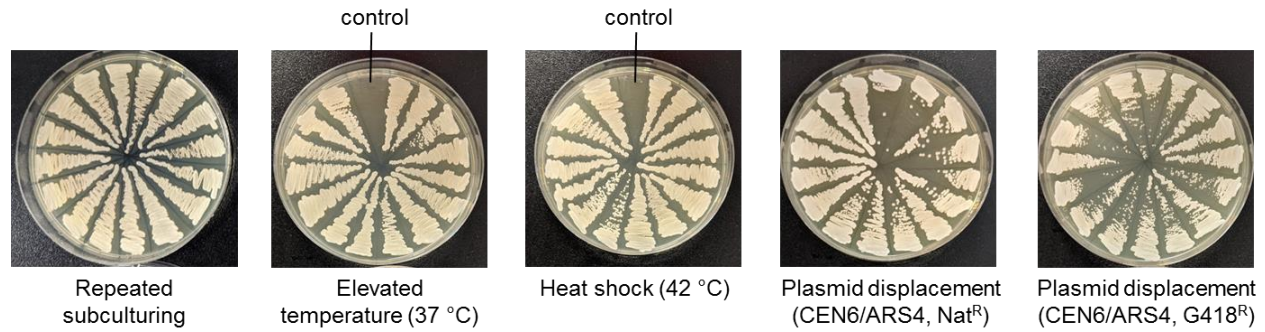

**Supplementary Figure 2. Attempted curing of plasmid pCas-Hyg-CEN6ARS4-ADE2 from *P. occidentalis* Y-7552.** Various curing methods were assessed to cure cells of the pCas-Hyg-ADE2 plasmid. Hyg<sup>R</sup> colonies were subcultured six times without selection at 30 °C (repeated subculturing) or 37 °C (elevated temperature) prior to screening colonies on YPD agar plates containing hygromycin. Curing was also attempted by heat-shocking cells at 42 °C in a mock lithium-acetate-PEG transformation (heat shock) or by attempting to displace the original pCas-Hyg-ADE2 plasmid with Nat<sup>R</sup> or G418<sup>R</sup> derivatives containing the same CEN6/ARS4 origin. Wild-type *P. occidentalis* lacking a pCas plasmid was included as a control.

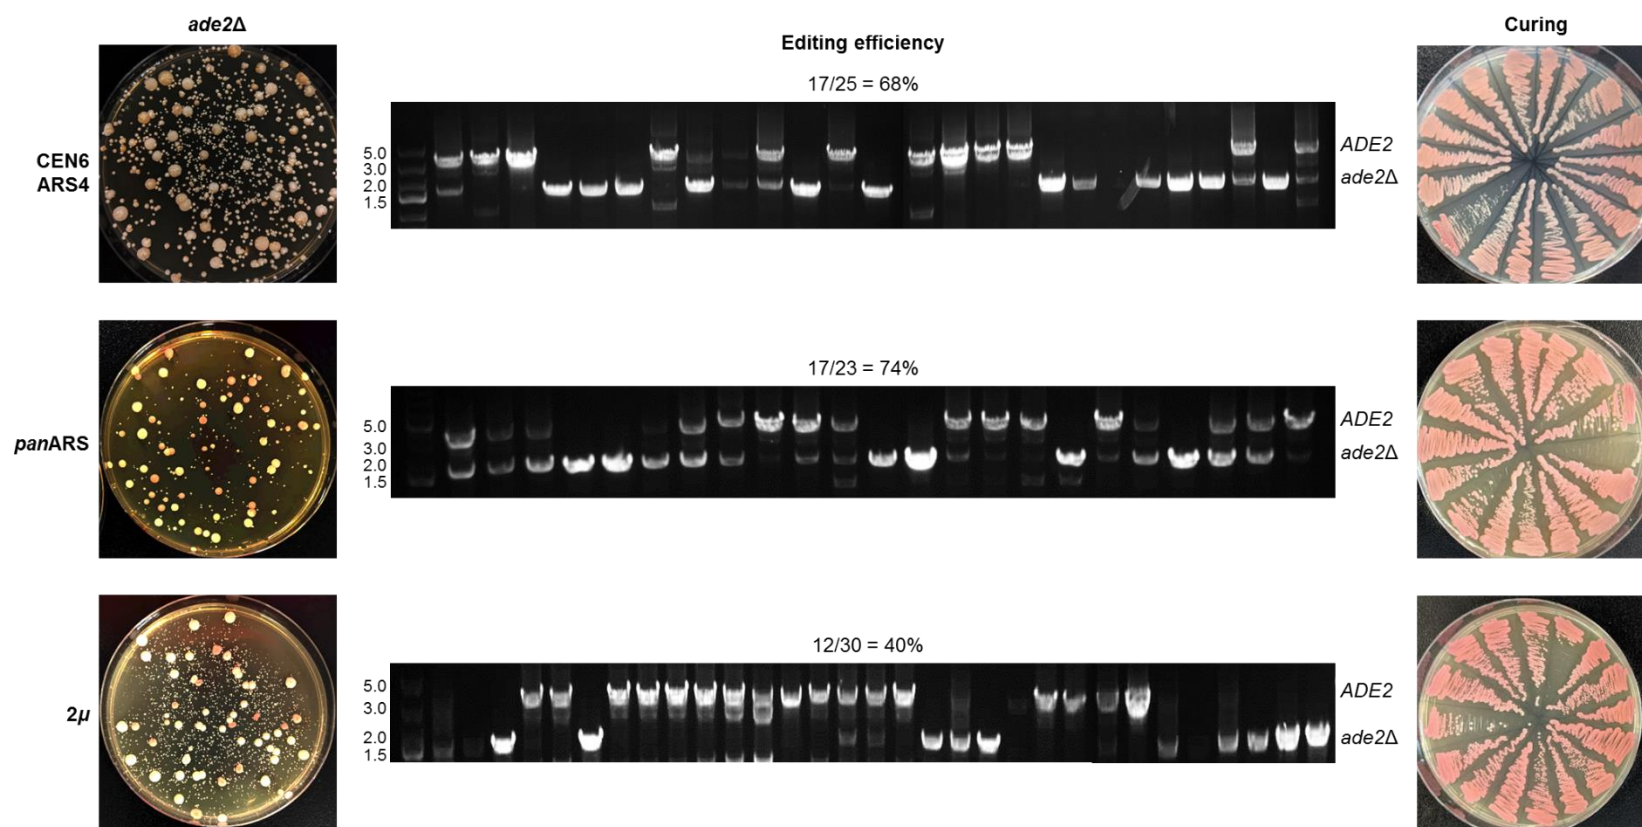

**Supplementary Figure 3. Deletion of *ADE2* in *P. occidentalis* Y-7552 using various pCas plasmid origins.** The *P. occidentalis* *ADE2* gene was deleted using a pCas-Hyg-*ADE2* plasmid containing a CEN6/ARS4, *panARS*, or  $2\mu$  origin. Editing efficiency is shown based on screening of 23-30 random colonies. One *ade2Δ* mutant colony containing each plasmid origin was subcultured six times in YPD without selection and resultant colonies were screened for loss of Hyg<sup>R</sup> on YPD agar plates containing hygromycin. Repeating *ADE2* deletion using different plasmid origins routinely yielded similar editing efficiencies. Source data are provided as a Source Data file.

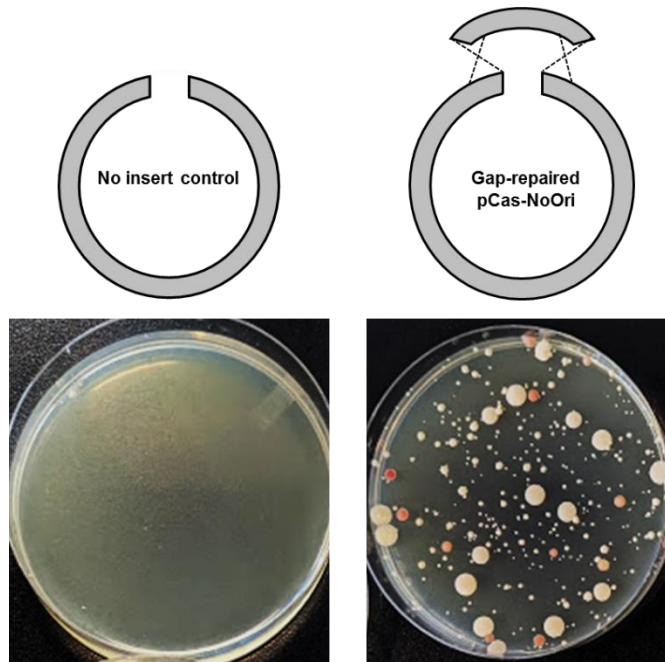

**Supplementary Figure 4. Deletion of *ADE2* in *P. occidentalis* Y-7552 without a plasmid origin.** The *P. occidentalis ADE2* gene was deleted using a pCas-Hyg-ADE2 plasmid lacking a plasmid origin. Plasmid pCas-Hyg-ADE2 was digested within the CEN6/ARS4 origin and the linearized plasmid was used to transform *P. occidentalis* along with an overlapping gap repair template lacking a plasmid origin. The resulting origin-less pCas plasmid generated red colonies following selection on YPD agar containing hygromycin. Omitting a linear gap repair template failed to generate Hyg<sup>R</sup> transformants (no insert control).

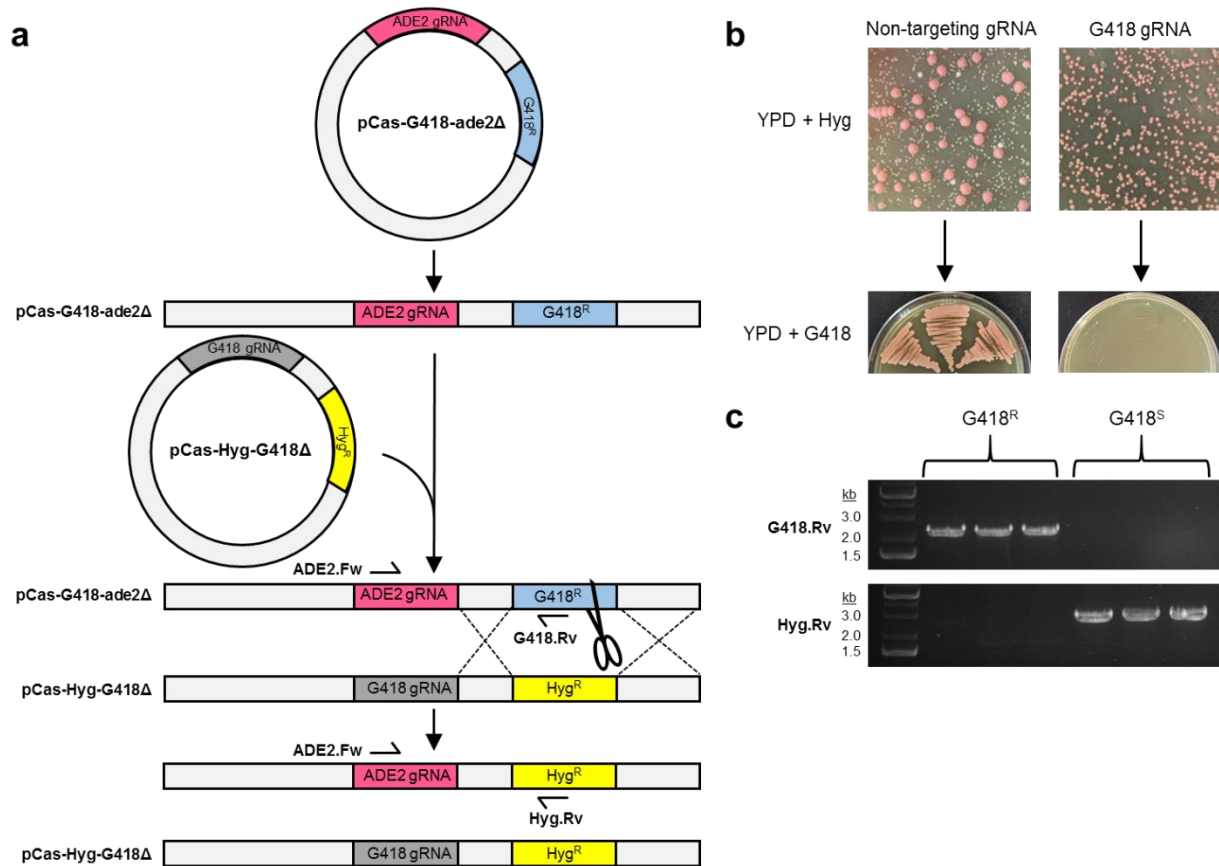

**Supplementary Figure 5. Plasmid integration and antibiotic marker recycling in *P. occidentalis* Y-7552.** **a**, Proposed mechanism of plasmid integration and antibiotic marker recycling. Introduction of plasmid pCas-G418-ade2Δ and selection of G418<sup>R</sup> colonies yields pink *ade2*Δ colonies upon integration of pCas-G418-ade2Δ. Transformation of a pink G418<sup>R</sup> *ade2*Δ mutant with plasmid pCas-Hyg-G418Δ harboring a Hyg<sup>R</sup> marker and a gRNA targeting chromosomal G418<sup>R</sup> yields Hyg<sup>R</sup> colonies upon chromosomal integration of pCas-Hyg-G418Δ. Transcription of the G418 gRNA introduces a double stranded DNA break to the chromosomal G418<sup>R</sup> marker, which is repaired by the homologous chromosomal Hyg<sup>R</sup> marker. The resulting strain lacks a G418<sup>R</sup> marker. Primers used for PCR screening in **c** are shown. **b**, Introduction of a gRNA targeting a chromosomal G418<sup>R</sup> marker yields a substantial increase in Hyg<sup>R</sup> transformants compared to a control transformation utilizing a non-targeting gRNA (top). In line with the mechanism outlined in **a**, Hyg<sup>R</sup> colonies transformed with G418 gRNA lost G418<sup>R</sup>, while colonies transformed with a non-targeting gRNA retained G418<sup>R</sup> (bottom). **c**, Colony PCR confirmation of the proposed marker swapping mechanism outlined in **a**. Screening G418<sup>S</sup> colonies using primers ADE2.Fw + G418.Rv confirms loss of the chromosomal G418-resistance marker. Screening G418<sup>S</sup> colonies using primers ADE2.Fw + Hyg.Rv confirms acquisition of the Hyg<sup>R</sup> marker not observed in G418<sup>R</sup> colonies transformed with a non-targeting gRNA. Three representative G418<sup>R</sup> and G418<sup>S</sup> colonies were screened. Source data are provided as a Source Data file.

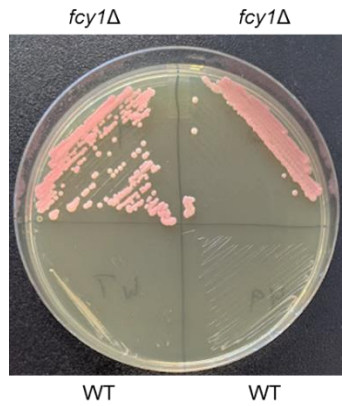

**Supplementary Figure 6. Deletion of *FCY1* confers resistance to 5-fluorocytosine (5-FC).** *FCY1* was deleted in an *ade2Δ* G418<sup>R</sup> host using pCas-Hyg-CEN6ARS4-PoADE2. Transformants were restreaked onto YPD agar plates overlaid with 400  $\mu$ l of a 10 g L<sup>-1</sup> solution of 5-FC.



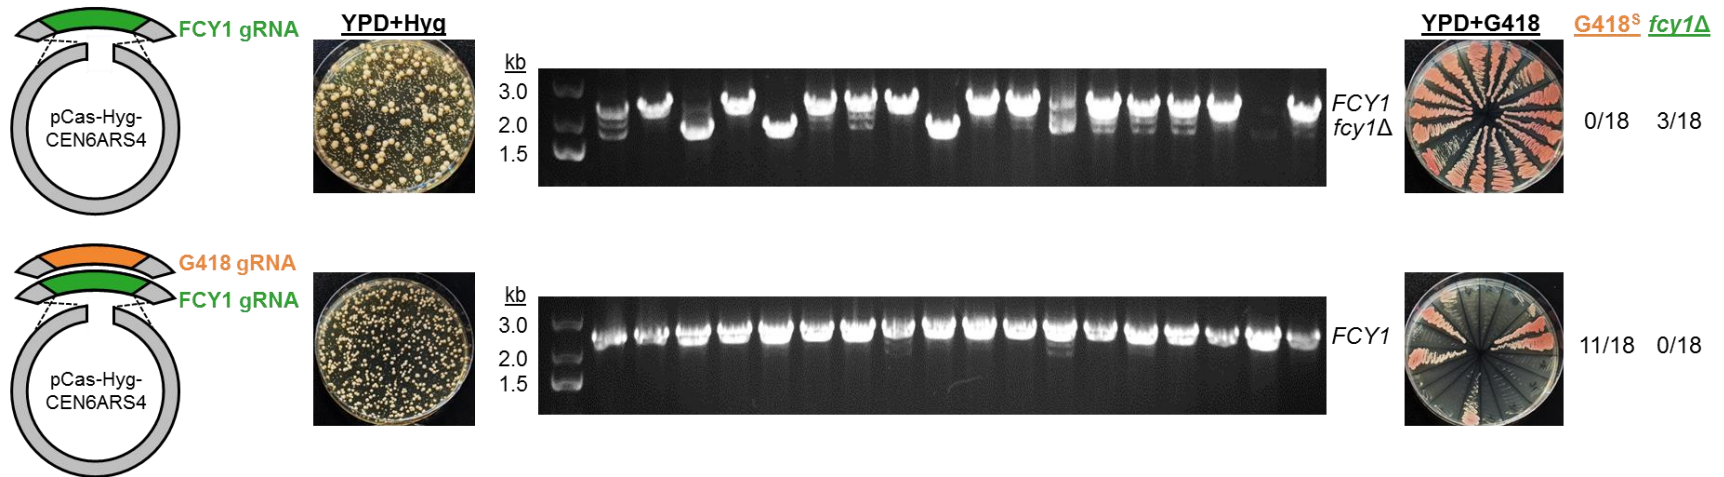

**Supplementary Figure 7. Deletion of *FCY1* and G418<sup>R</sup> marker recycling in *P. occidentalis* Y-7552 using dual gRNA species.** Dual gRNA species targeting a chromosomal G418<sup>R</sup> marker and the *FCY1* gene were introduced to a G418<sup>R</sup> *ade2Δ* mutant (bottom) and compared to a control transformation using a single *FCY1* gRNA (top). Hyg<sup>R</sup> transformants were scored for *fcy1Δ* by colony PCR and G418<sup>S</sup> by restreaking transformants onto YPD+G418. Source data are provided as a Source Data file.



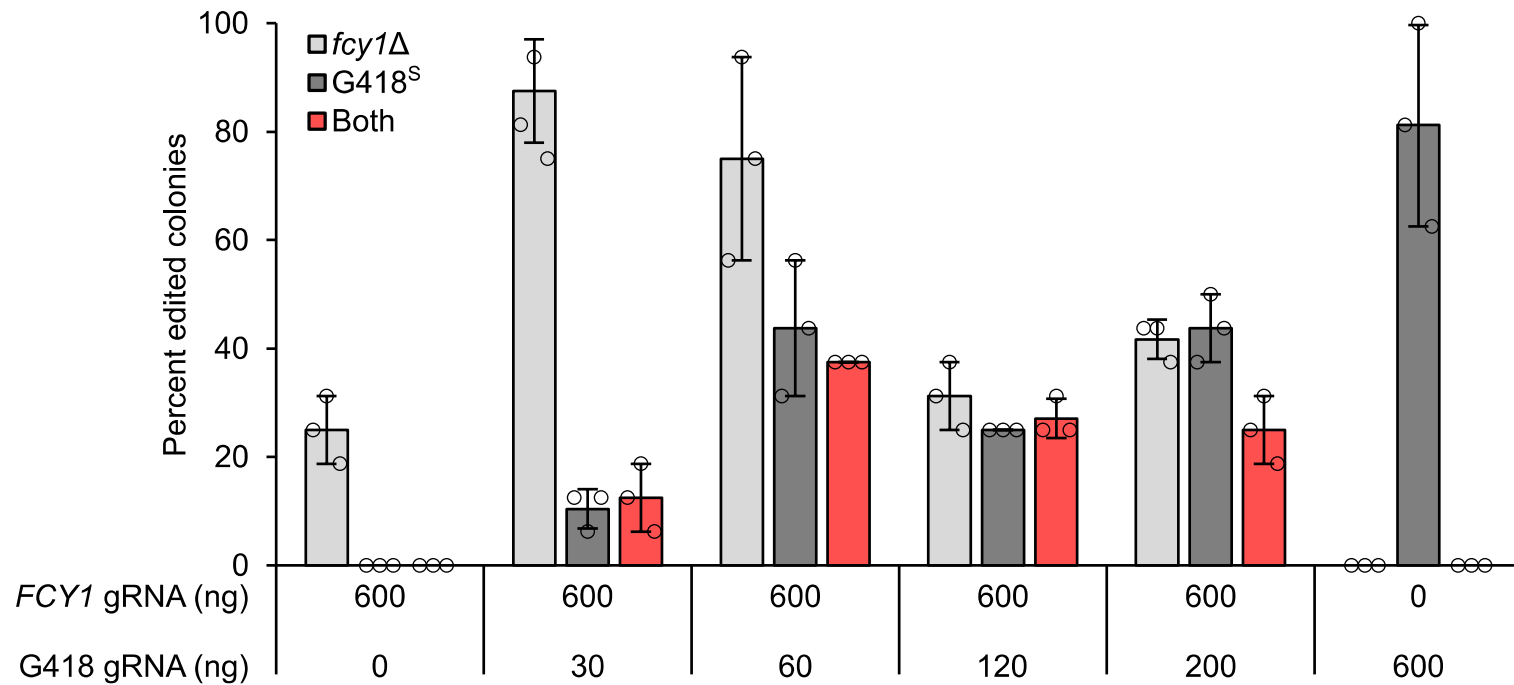

**Supplementary Figure 8. Titration of *FCY1* and *G418<sup>R</sup>* gRNA species.** Varying amounts of *G418* gRNA and 600 ng of *FCY1* gRNA were introduced to a *G418<sup>R</sup> ade2Δ* mutant using pCas-Hyg-CEN6ARS4. Sixteen Hyg<sup>R</sup> transformants from each condition were scored for *fcy1Δ* and *G418<sup>S</sup>* by restreaking onto YPD plates containing 5-FC and *G418*, respectively. Error bars represent the mean  $\pm$  s.d. of  $n = 3$  independent biological samples. Source data are provided as a Source Data file.

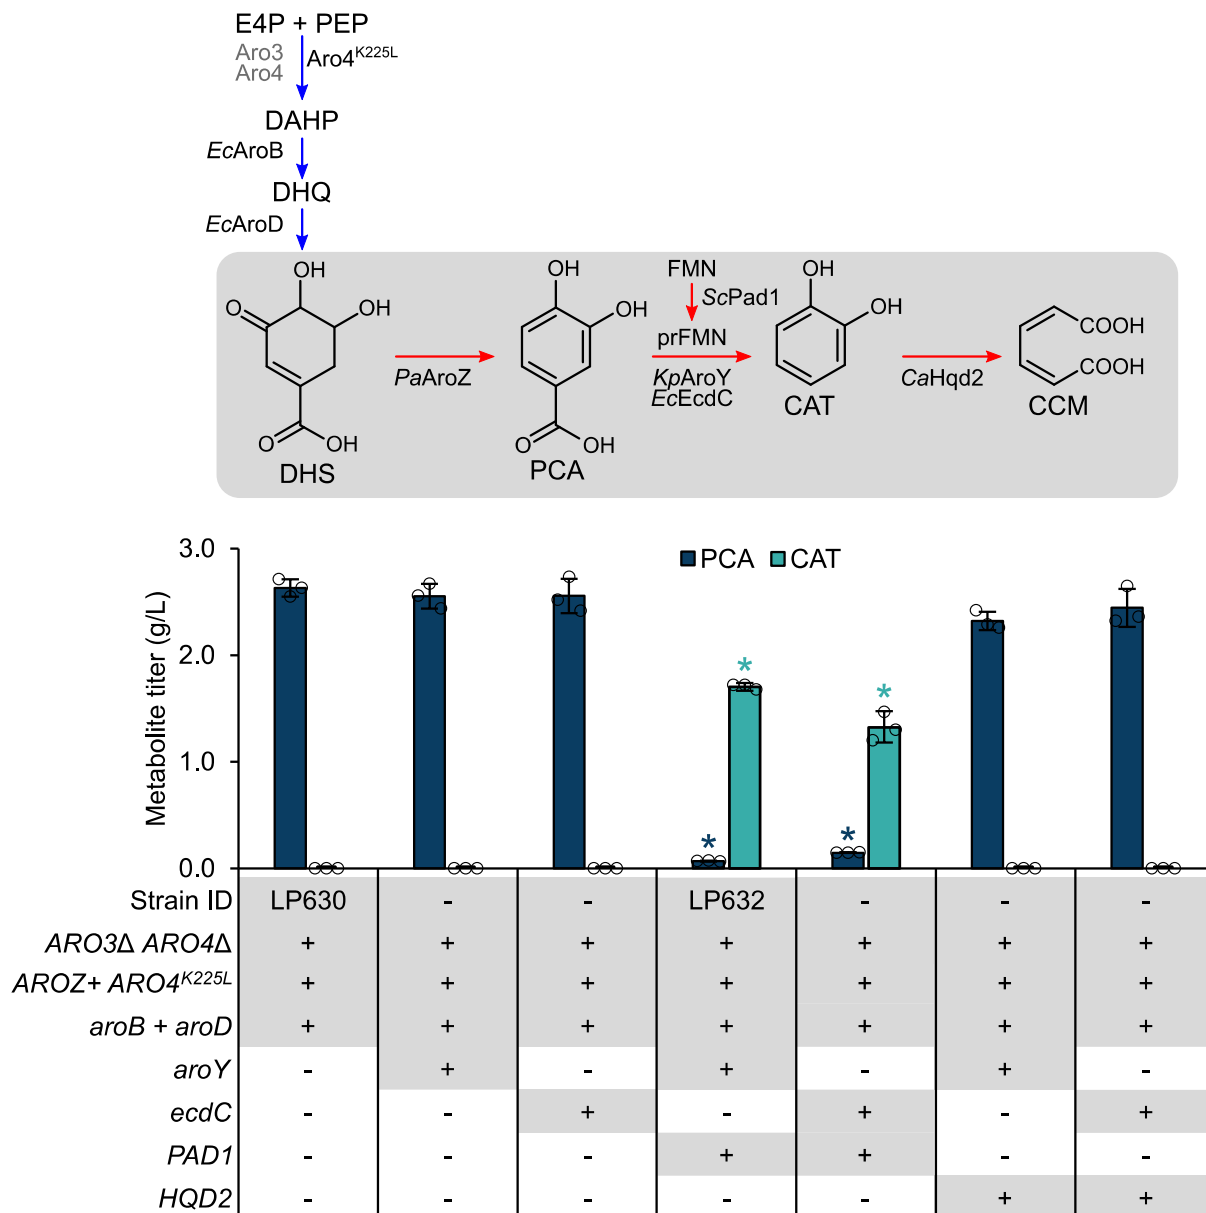

**Supplementary Figure 9. Pad1 is required for PCA decarboxylase activity in engineered *P. occidentalis*.** Combinations of PCA decarboxylase (*KpAroY* or *EcEcdC*), FMN prenyltransferase (*ScPad1*) and catechol dioxygenase (*CaHqd2*) were introduced to PCA-producing *P. occidentalis* (LP630). The native shikimate and heterologous CCM synthesis pathway are depicted in blue and red, respectively. Asterisks (\*) denote a significant decrease in PCA titer or increase in catechol titer relative to the parent strain ( $P < 0.05$ ). Statistical differences between parent and derivative strains were tested using two-tailed Student's *t*-test. Error bars represent the mean  $\pm$  s.d. of  $n = 3$  independent biological samples. Abbreviations: CAT, catechol; CCM, *cis,cis*-muconic acid; DAHP, 3-deoxy-D-arabinoheptulosonate 7-phosphate; DHQ, 3-dehydroquininate; DHS, 3-dehydroshikimate; E4P, erythrose 4-phosphate; FMN, flavin mononucleotide; PCA, protocatechuic acid; PEP, phosphoenolpyruvate; prFMN; prenylated flavin mononucleotide. Source data are provided as a Source Data file.

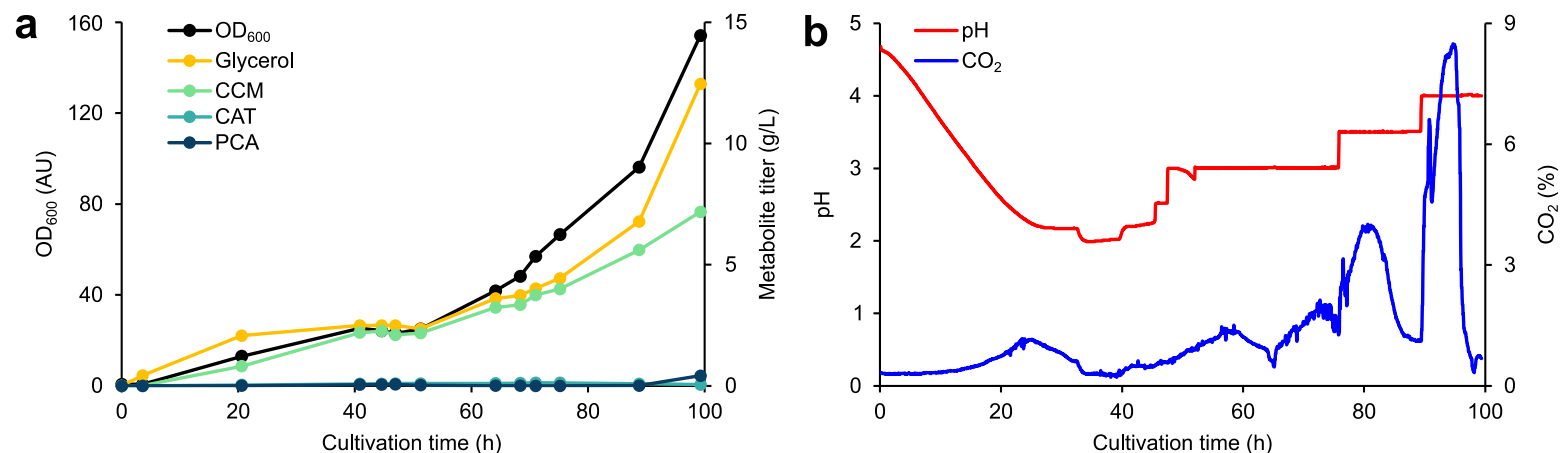

**Supplementary Figure 10. Cultivation of a CCM-producing *P. occidentalis* strain (LP635) in a glucose-limited fed-batch fermentor at low pH.** A CCM-producing strain (LP635) was fed 0.5 L of medium containing 360 g L<sup>-1</sup> glucose. Biomass (OD<sub>600</sub>) and heterologous product accumulation (**a**), and pH and CO<sub>2</sub> traces (**b**) are depicted. pH was adjusted manually using 4 N NaOH based on a decline in CO<sub>2</sub> production. Source data are provided as a Source Data file.

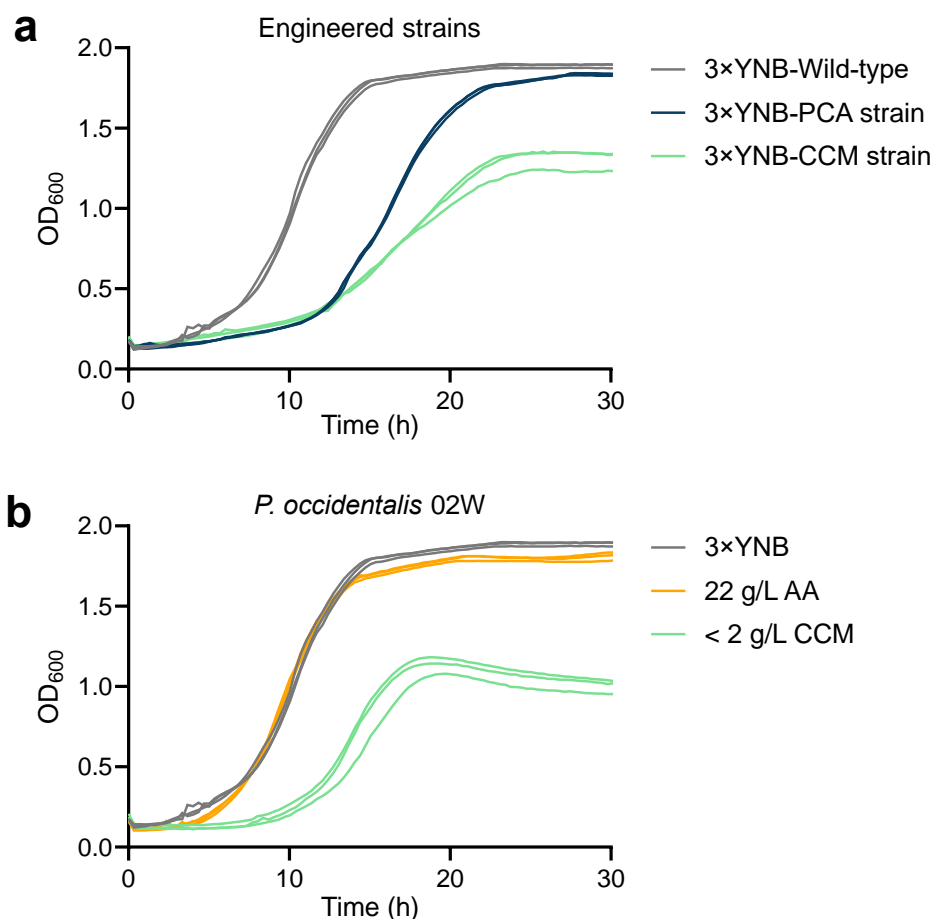

**Supplementary Figure 11. Growth curves of engineered CCM-producing *P. occidentalis* and the wild-type strain supplemented with exogenous CCM.** **a**, Growth of CCM-producing *P. occidentalis* and its PCA-producing precursor. Strains were cultivated in 3× YNB. **b**, Growth of wild-type *P. occidentalis* in 3× YNB saturated with adipic acid (22 g L<sup>-1</sup> or 0.15 M) or CCM (< 2 g L<sup>-1</sup>).  $n = 3$  independent biological samples are overlaid for each strain and growth condition. Source data are provided as a Source Data file.

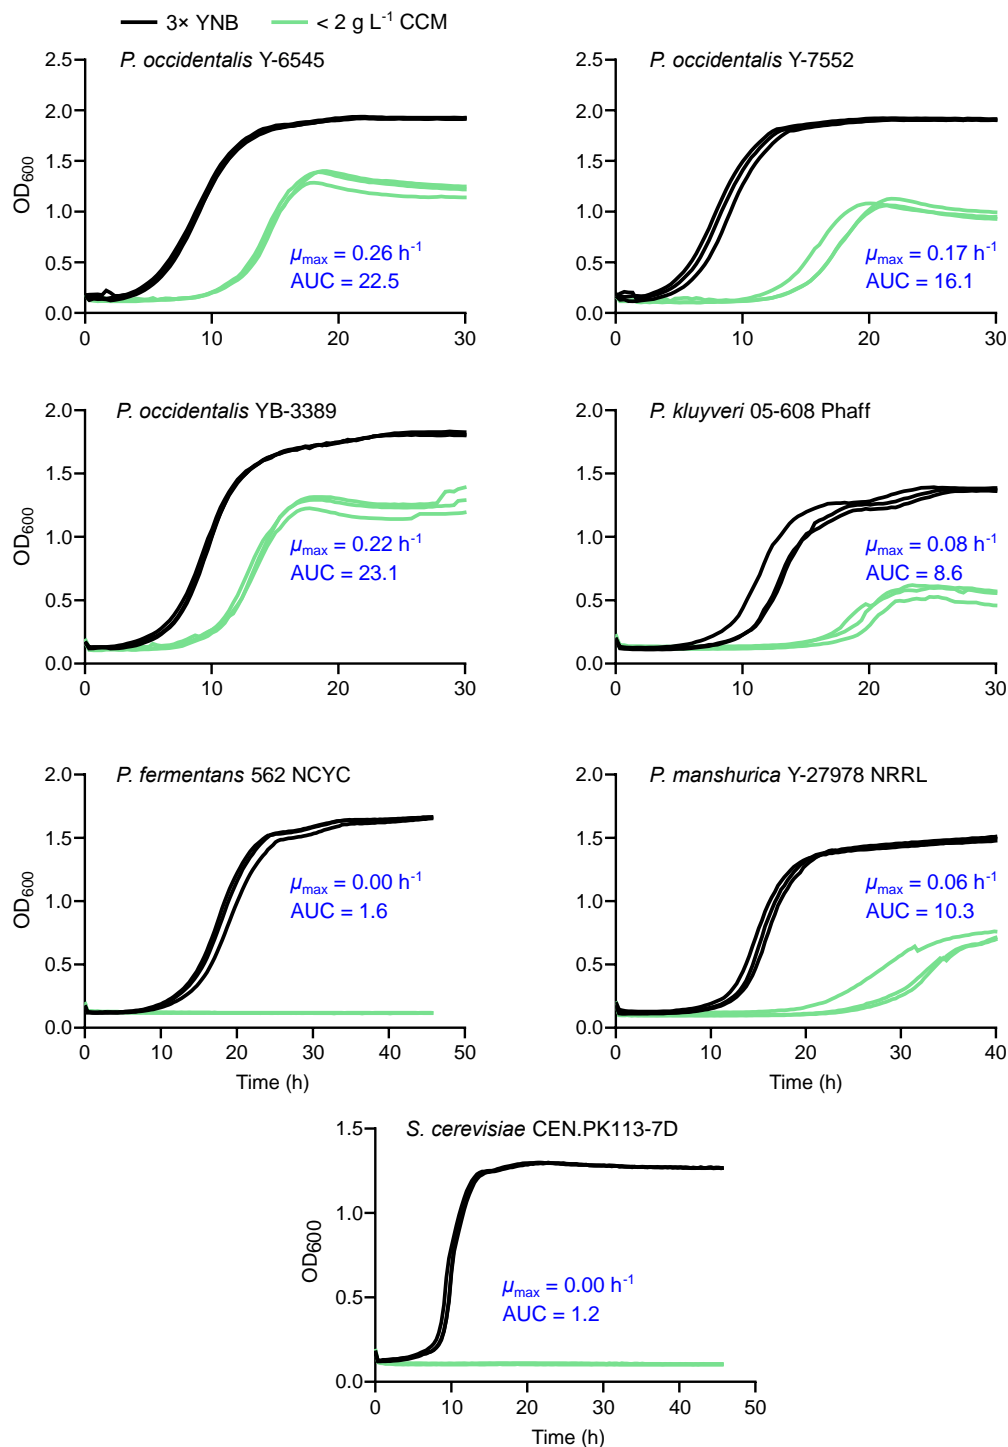

**Supplementary Figure 12. Growth curves of adipic-acid-tolerant *Pichia* strains supplemented with exogenous CCM.** 3× YNB was saturated with CCM (< 2 g L<sup>-1</sup>).  $n = 3$  independent biological samples are overlaid for each strain and growth condition. Maximum growth rate ( $\mu_{\max}$ ) and area under the curve (AUC) are shown in blue for each strain grown in CCM. Source data are provided as a Source Data file.

**Supplementary Table 1. Phenotypic overview of adipic acid tolerant *Pichia* species.<sup>a</sup>**

| <b>Characteristic<sup>b</sup></b> | <i>P. occidentalis</i> | <i>P. kluyveri</i> | <i>P. manshurica</i> | <i>P. kudriavzevii</i> | <i>P. membranifaciens</i> | <i>P. fermentans</i> |
|-----------------------------------|------------------------|--------------------|----------------------|------------------------|---------------------------|----------------------|
| Glucose fermentation              | +                      | +                  | v                    | +                      | v                         | +                    |
| Galactose fermentation            | -                      | -                  | -                    | -                      | -                         | -                    |
| Sucrose fermentation              | -                      | -                  | -                    | -                      | -                         | -                    |
| Lactose fermentation              | -                      | -                  | -                    | -                      | -                         | -                    |
| Glucose                           | +                      | +                  | +                    | +                      | +                         | +                    |
| Sucrose                           | -                      | -                  | -                    | -                      | -                         | -                    |
| Galactose                         | -                      | -                  | -                    | -                      | -                         | -                    |
| Lactose                           | -                      | -                  | -                    | -                      | -                         | -                    |
| Soluble starch                    | -                      | -                  | -                    | -                      | -                         | -                    |
| Cellobiose                        | -                      | -                  | -                    | -                      | -                         | -                    |
| L-Sorbose                         | v                      | -                  | v                    | -                      | v                         | -                    |
| L-Rhamnose                        | -                      | -                  | -                    | -                      | -                         | -                    |
| D-Xylose                          | -                      | v                  | -                    | -                      | v                         | +                    |
| L-Arabinose                       | -                      | -                  | -                    | -                      | -                         | -                    |
| D-Arabinose                       | -                      | -                  | -                    | -                      | -                         | -                    |
| Ethanol                           | +                      | +                  | +                    | +                      | +                         | +                    |
| Glycerol                          | +                      | +                  | v                    | +                      | v                         | +                    |
| Vitamin-free                      | +                      | -                  | v                    | +                      | v                         | -                    |

<sup>a</sup> data obtained from Kurtzman *et al.*<sup>1</sup>

<sup>b</sup> growth data is provided under aerobic conditions unless stated otherwise

-, negative; +, positive; v, variable

### **Supplementary reference**

- 1 Kurtzman, C., Fell, J. W. & Boekhout, T. The yeasts: a taxonomic study. (Elsevier, 2011).
